# Supplementary material
Source: ML conference proceedings conference paper supplement (https://openaccess.thecvf.com/content/ICCV2021/html/Yang_Mining_Latent_Classes_ICCV_2021_paper.html)
Supplement: Supplementary file 1 [file Yang_Mining_Latent_Classes_ICCV_2021_supplemental.pdf]

# Mining Latent Classes for Few-shot Segmentation Supplementary Material

Lihe Yang<sup>1</sup> Wei Zhuo<sup>2</sup> Lei Qi<sup>3,1</sup> Yinghuan Shi<sup>1</sup> Yang Gao<sup>1</sup>

<sup>1</sup>State Key Laboratory for Novel Software Technology, Nanjing University  
<sup>2</sup>Tencent

<sup>3</sup>Key Lab of Computer Network and Information Integration (Ministry of Education), Southeast University  
lihe.yang.cs@gmail.com weizhuo@tencent.com qilei@seu.edu.cn {syh, gaoy}@nju.edu.cn

## 1. More qualitative results on PASCAL-5<sup>i</sup> and COCO-20<sup>i</sup>

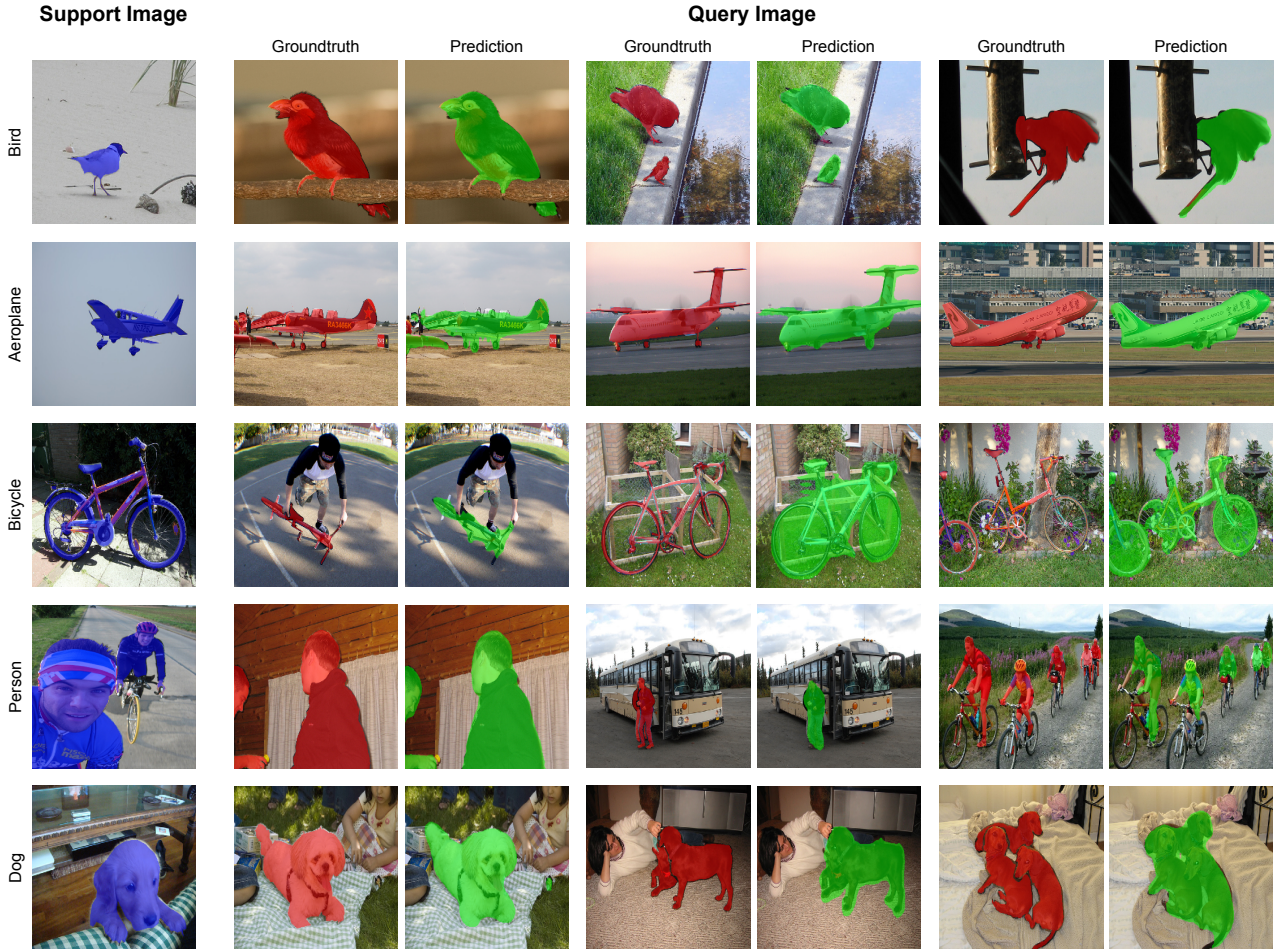

Figure 1. Qualitative results of our method in 1-way 1-shot setting on PASCAL-5<sup>i</sup>

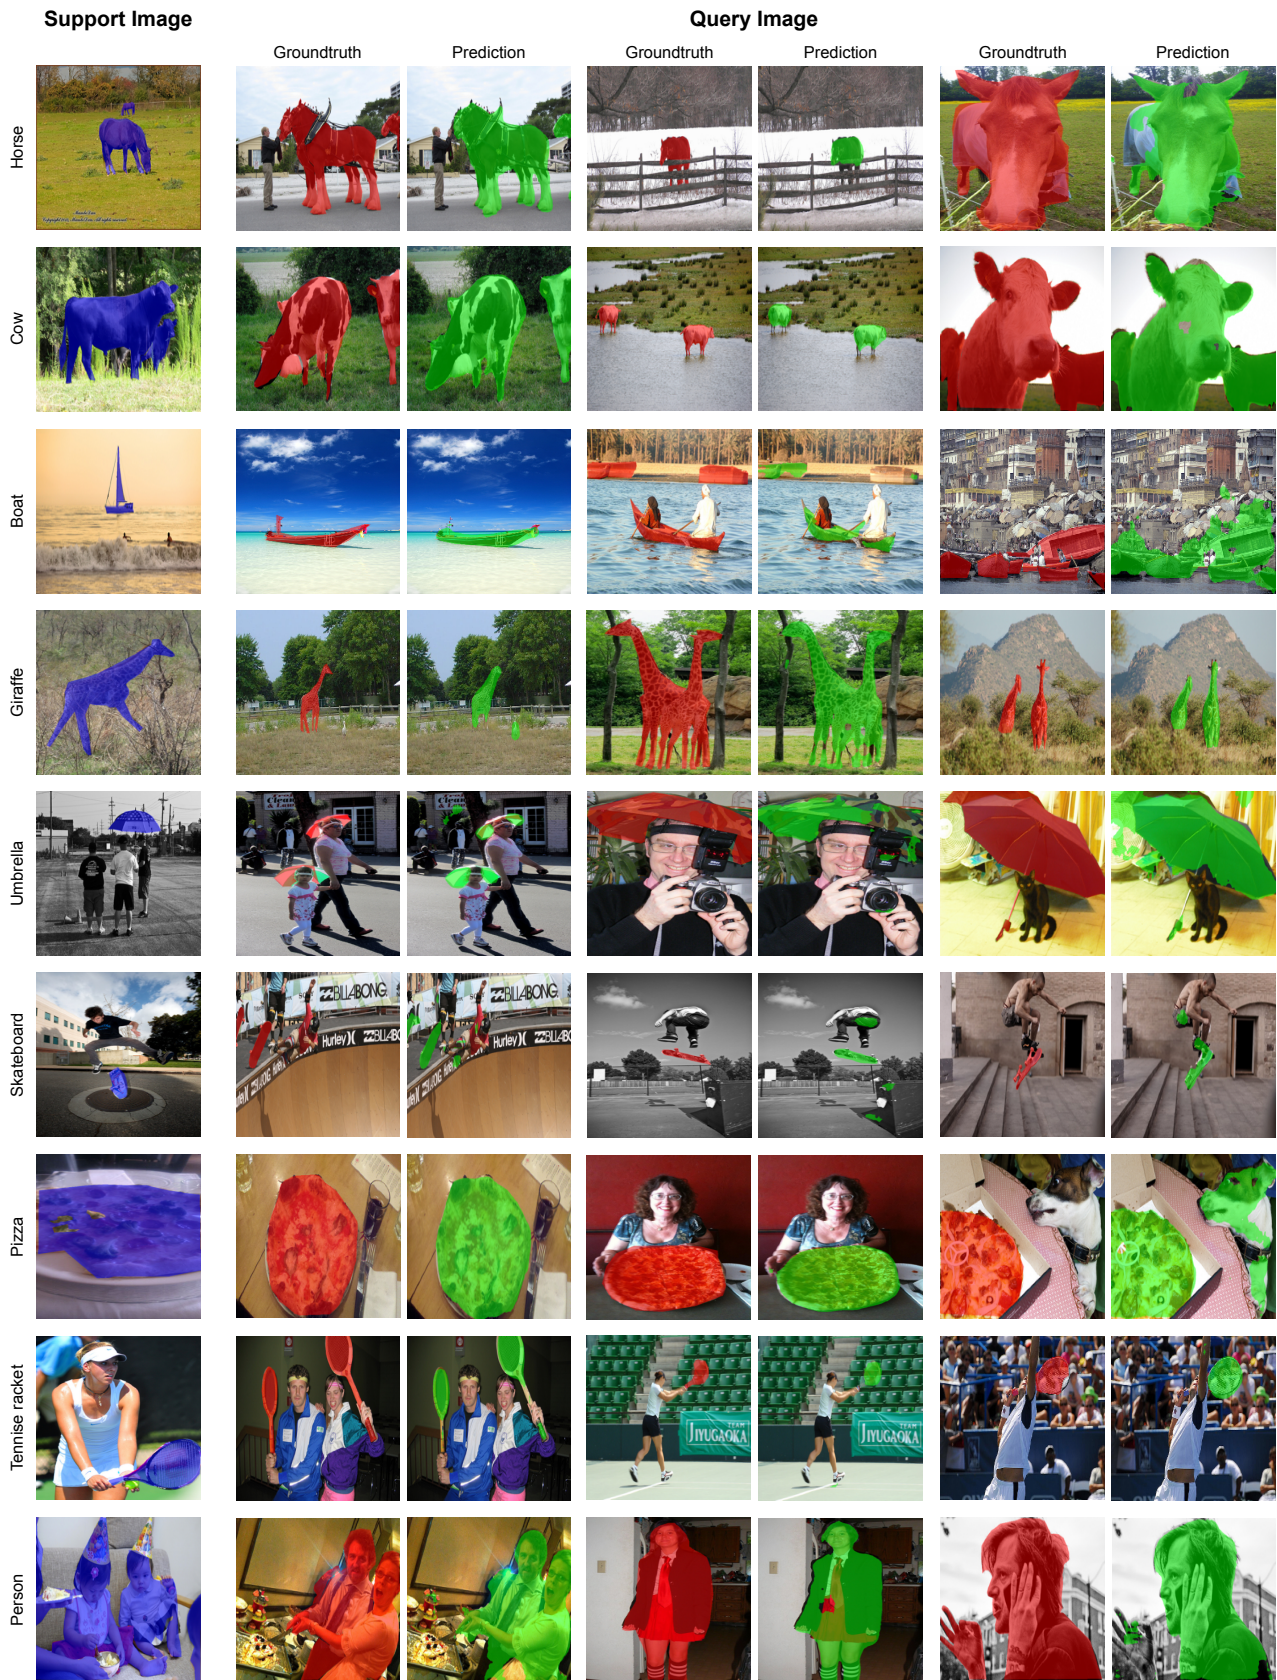

Figure 2. Qualitative results of our method in 1-way 1-shot setting on COCO-20<sup>i</sup>
